# Supplementary material
Source: PubMed Central journal article supplement (PMC2002601)
Supplement: plntcell_tpc.107.053009_1.pdf [file plntcell_tpc.107.053009_1.pdf]

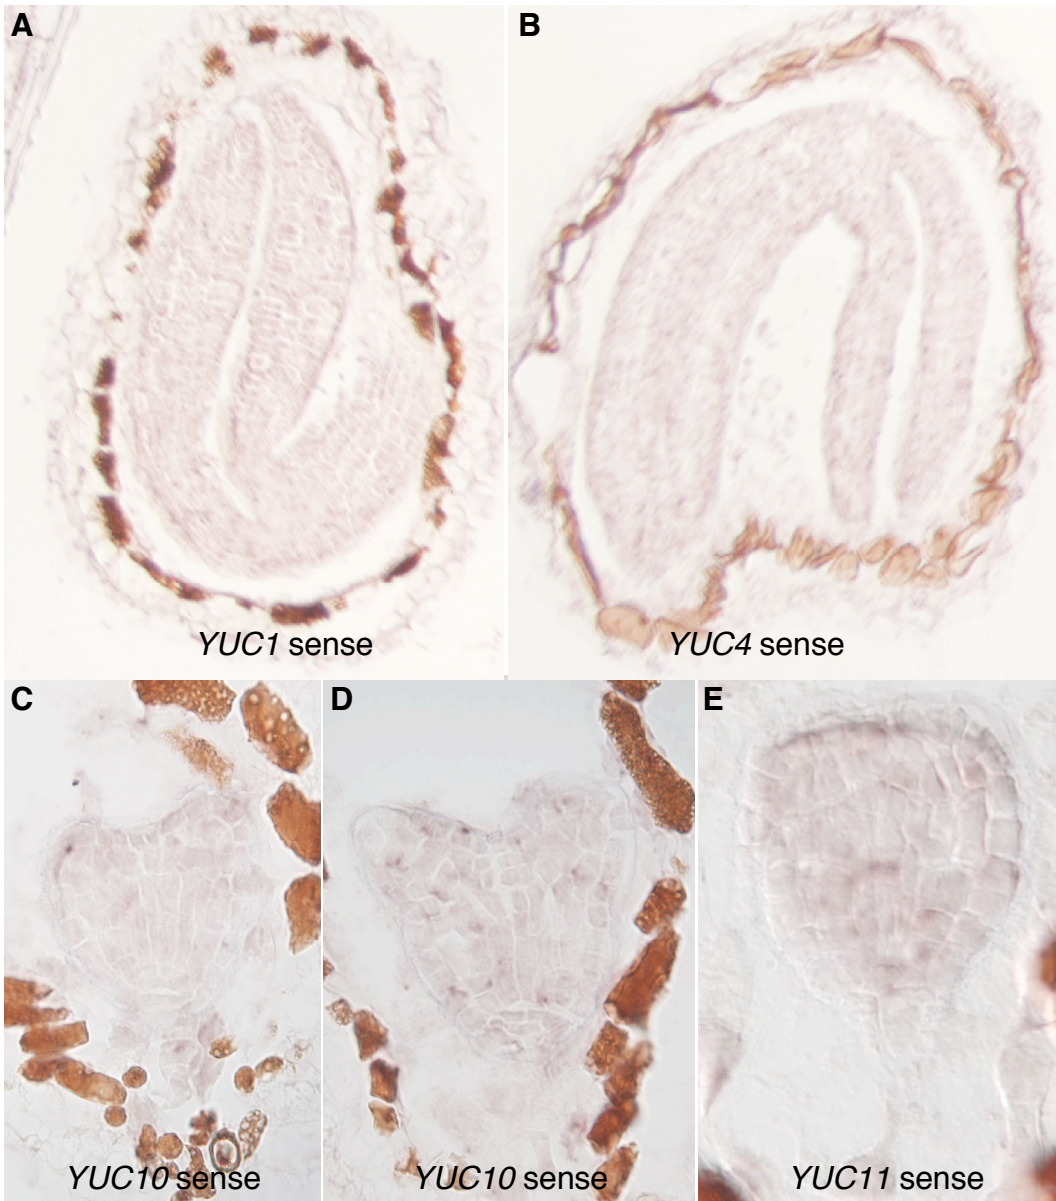

**Cheng et al, supplemental figure 1: RNA in situ hybridization using sense probes of *YUC* genes.** A) *YUC1* sense probe; B) *YUC4* sense probe; C & D) *YUC10* sense probe; and E) *YUC11* sense probe.
