# Supplementary material
Source: PubMed Central journal article supplement (PMC2002601)
Supplement: plntcell_tpc.107.053009_2.pdf [file plntcell_tpc.107.053009_2.pdf]

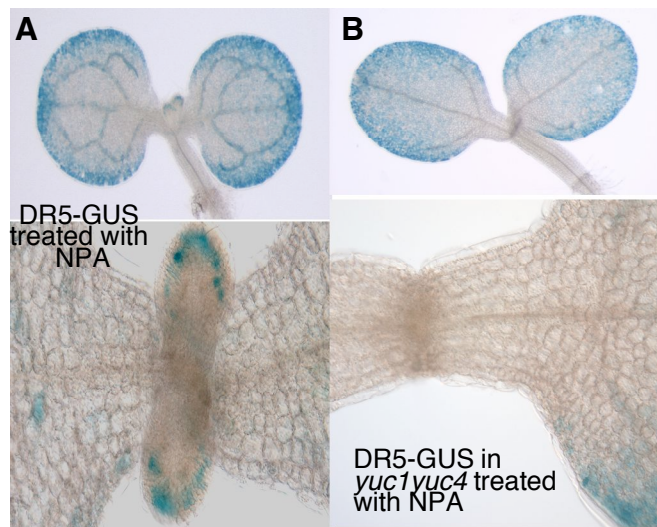

**Cheng et al, supplemental Figure 2:  
Effects of NPA treatment on DR5-GUS  
expression in *yuc1 yuc4* double mutants.**

A) DR5-GUS in wild type; B) DR5-GUS in  
*yuc1 yuc4*. The seedlings were grown on  
NPA-containing media for 5 days.
